# Supplementary material
Source: PubMed Central journal article supplement (PMC2600720)

# Neutral and Cationic Alkyl Tantalum Imido Complexes: Synthesis and Migratory Insertion Reactions

*Laura L. Anderson, Joseph A. R. Schmidt, John Arnold\*, Robert G. Bergman\**

Department of Chemistry, University of California, Berkeley, Berkeley, CA 94720

rbergman@berkeley.edu, arnold@berkeley.edu

## Supporting Information

**General Procedures for X-Ray Crystallography.** Relevant data for **1** are summarized in Table 1. A crystal of appropriate size was mounted on a glass capillary using Paratone-N hydrocarbon oil. The crystal was transferred to a Siemens SMART diffractometer/CCD area detector,<sup>1</sup> centered in the beam, and cooled by a nitrogen flow low-temperature apparatus that had been previously calibrated by a thermocouple placed at the same position as the crystal. Preliminary orientation matrices and cell constants were determined by collection of 60 10-second frames, followed by spot integration and least-squares refinement. An arbitrary hemisphere of data was collected and the raw data were integrated using SAINT.<sup>2</sup> Cell dimensions reported in Table 1 were calculated from

all reflections with  $I > 10 \sigma$ . The data were corrected for Lorentz and polarization effects, but no correction for crystal decay was applied. Data were analyzed for agreement and possible absorption using XPREP.<sup>3</sup> An empirical absorption correction based on comparison of redundant and equivalent reflections was applied using SADABS.<sup>4</sup> The structure was solved and refined with teXsan software package.<sup>5</sup> ORTEP diagrams were created using ORTEP-3 software package.<sup>6</sup>

**Figure S1.** Ortep Diagram of Compound 1.

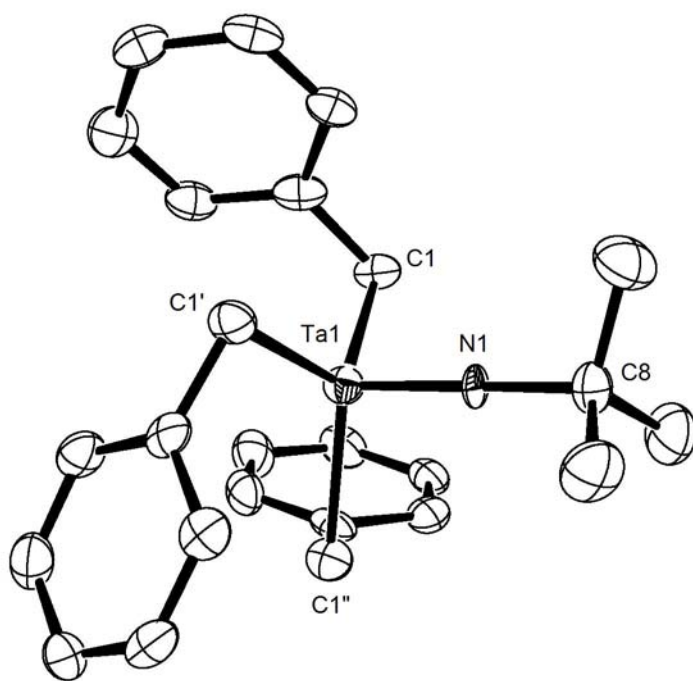

## EXPERIMENTAL DETAILS

### A. Crystal Data

|                      |                                                                                                                            |
|----------------------|----------------------------------------------------------------------------------------------------------------------------|
| Empirical Formula    | C <sub>25</sub> H <sub>30</sub> NTa                                                                                        |
| Formula Weight       | 525.47                                                                                                                     |
| Crystal Color, Habit | yellow, block                                                                                                              |
| Crystal Dimensions   | 0.330 x 0.240 x 0.150 mm                                                                                                   |
| Crystal System       | Trigonal                                                                                                                   |
| Lattice Type         | Primitive                                                                                                                  |
| Lattice Parameters   | a = 11.158(1) Å<br>b = 11.158(1) Å<br>c = 10.156(1) Å<br>a = 90 °<br>b = 90 °<br>g = 120°<br>V = 1095.14(7) Å <sup>3</sup> |
| Space Group          | P31c                                                                                                                       |
| Z value              | 2                                                                                                                          |
| D <sub>calc</sub>    | 1.593 g/cm <sup>3</sup>                                                                                                    |
| F <sub>000</sub>     | 520.00                                                                                                                     |
| μ(MoKα)              | 5.02 cm <sup>-1</sup>                                                                                                      |

### B. Intensity Measurements

|                             |                                                                                          |
|-----------------------------|------------------------------------------------------------------------------------------|
| Diffractometer              | SMART CCD                                                                                |
| Radiation                   | MoKα(λ = 0.7107 Å)<br>graphite monochromated                                             |
| Detector Position           | 60.5 mm                                                                                  |
| Exposure Time               | 10 s seconds per frame.                                                                  |
| Scan Type                   | ω (0.3 degrees per frame)                                                                |
| No. of Reflections Measured | Total: 4878<br>Unique: 2340<br>(R <sub>int</sub> = 0.0413)                               |
| Corrections                 | Lorentz-polarization<br>Absorption (T <sub>max</sub> = 0.58,<br>T <sub>min</sub> = 0.32) |

### C. Structure Solution and Refinement

|                    |                           |
|--------------------|---------------------------|
| Structure Solution | Direct Methods (SIR92)    |
| Refinement         | Full-matrix least-squares |

|                                           |                                             |
|-------------------------------------------|---------------------------------------------|
| Function Minimized                        | $\Sigma w( F_o ^2 -  F_c ^2)^2$             |
| Least Squares Weighting scheme            | $w = 1/[\sigma^2(F_o^2) + (qP)^2 + 0.000P]$ |
|                                           | where $P = [F_o^2 + 2F_c^2]/3$              |
| p-factor                                  | 0.030                                       |
| Anomalous Dispersion                      | All non-hydrogen atoms                      |
| No. Observations ( $I > 2.00 \sigma(I)$ ) | 2062                                        |
| No. Variables                             | 81                                          |
| Reflection/Parameter Ratio                | 25.46                                       |
| Residuals: R; $R_w$ ; $R_{all}$           | 0.0239; 0.0307; 0.0258                      |
| Goodness of Fit Indicator                 | 1.253                                       |
| Max Shift/Error in Final Cycle            | 0.0000                                      |
| Maximum peak in Final Diff. Map           | $0.50 \text{ e}^-/\text{\AA}^3$             |
| Minimum peak in Final Diff. Map           | $-1.48 \text{ e}^-/\text{\AA}^3$            |

(1) *SMART: Area-Detector Software Package*, Siemens Industrial Automation, Inc.:

Madison, WI, **1995**.

(2) *SAINTE: SAX Area Detector Integration Program, V4.024*, Siemens Industrial

Automation, Inc.: Madison, WI, **1995**.

(3) *XPREP: Part of SHELXTL Crystal Structure Determination Package, V5.03*,

Siemens Industrial Automation, Inc.: Madison, WI, **1995**.

(4) *SADABS: Siemens Area Detector ABSorption correction program* **1996**.

(5) *TeXsan: Crystal Structure Analysis Software Package*, Molecular Structure

Corporation: The Woodlands, TX, **1992**.

(6) Farrugia, L. J. *J. Appl. Cryst.* **1997**, *30*, 565.

Images of 2D spectra for Compounds 5, 6, 7, 10, 12, 13, and 15 and a  $^1\text{H}$  NMR spectrum of 5.

$^1\text{H}$ - $^{13}\text{C}$  HMQC Spectrum for Compound 5

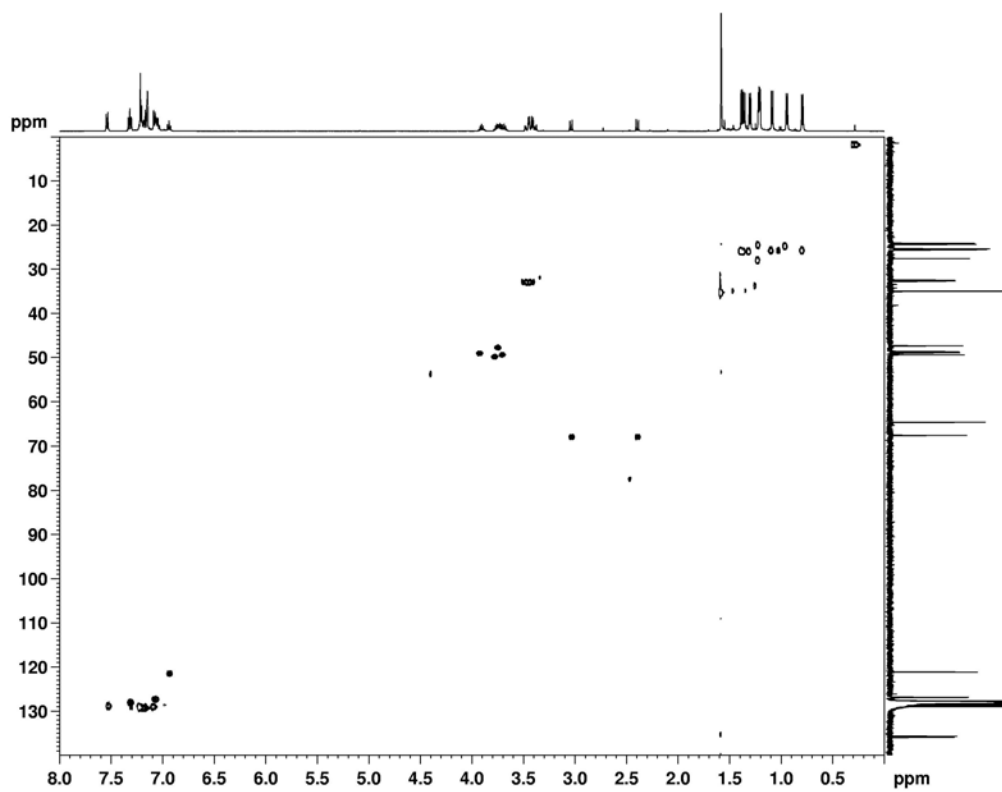

$^1\text{H}$ - $^{13}\text{C}$  HMBC Spectrum for Compound 5

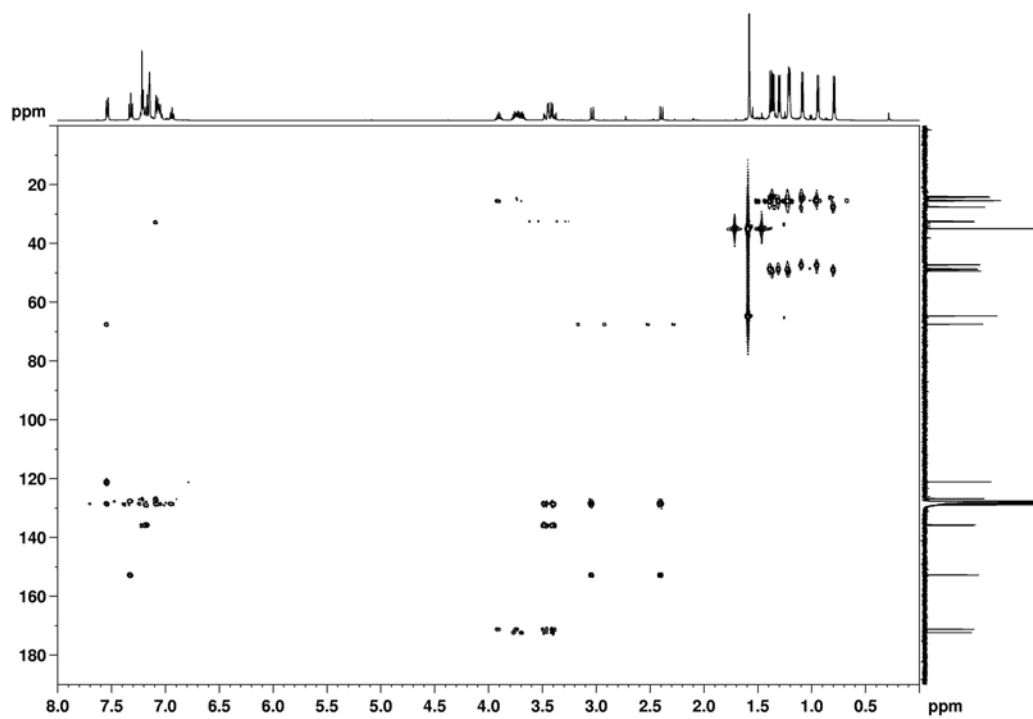

$^1\text{H}$ - $^{13}\text{C}$  HMQC Spectrum for Compound 6

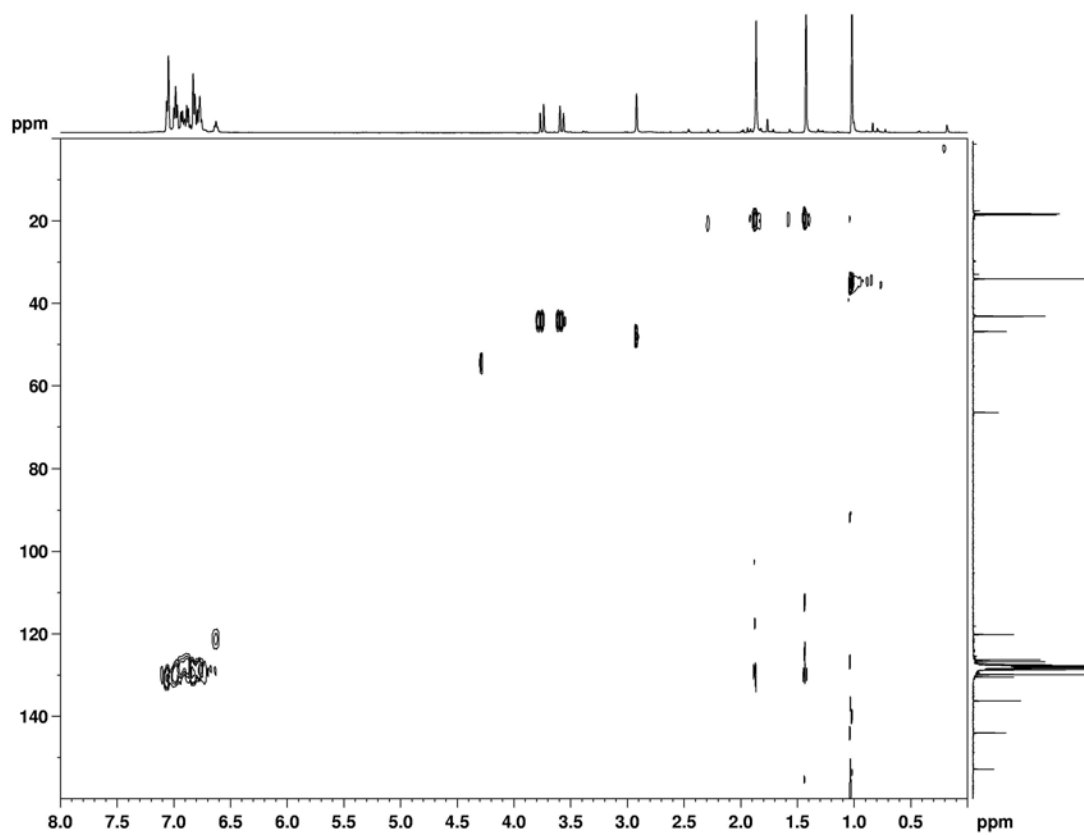

$^1\text{H}$ - $^{13}\text{C}$  HMBC Spectrum for Compound 6

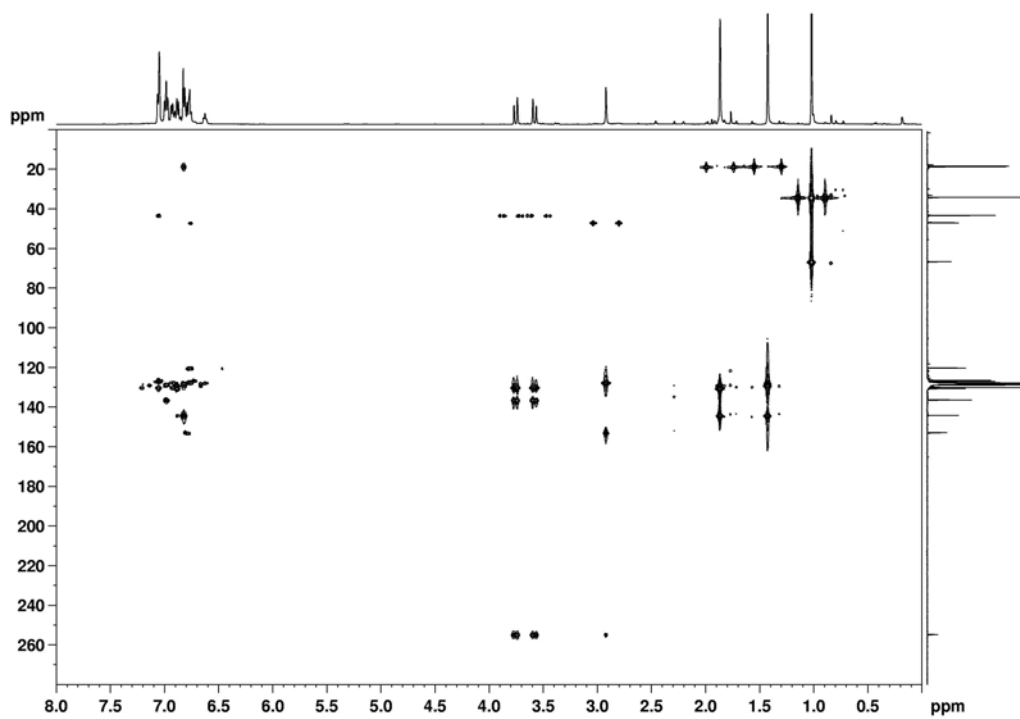



$^1\text{H}$ - $^{13}\text{C}$  HMQC Spectrum for Compound 7

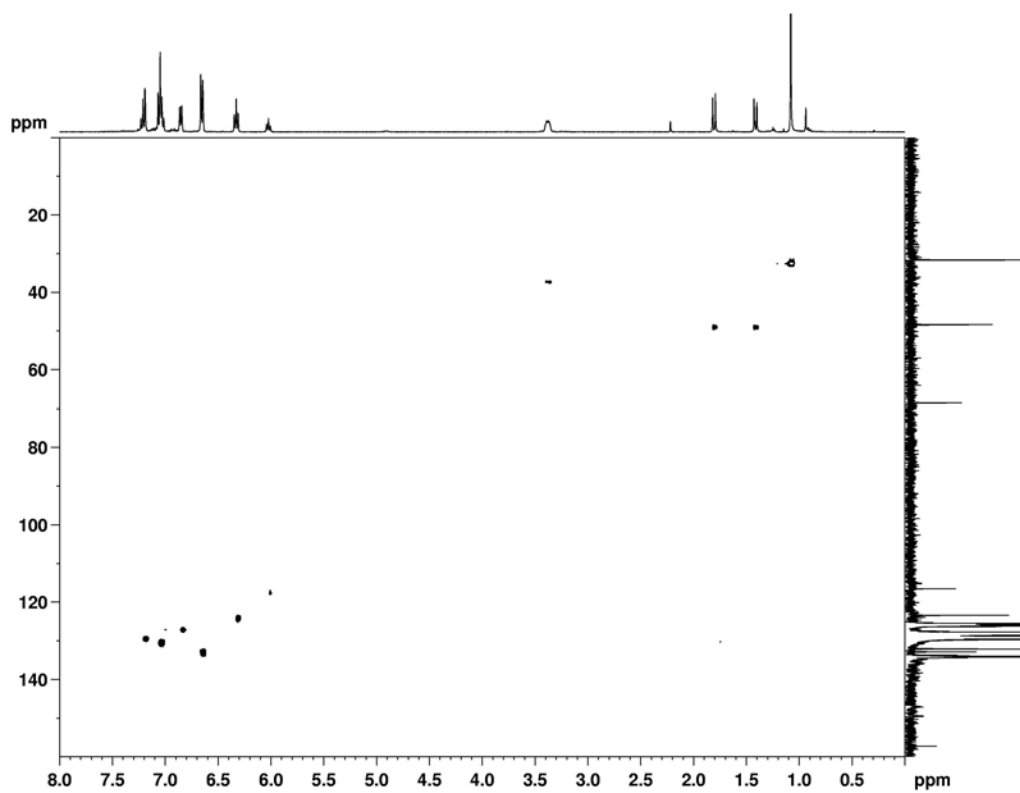

$^1\text{H}$ - $^{13}\text{C}$  HMBC Spectrum for Compound 7

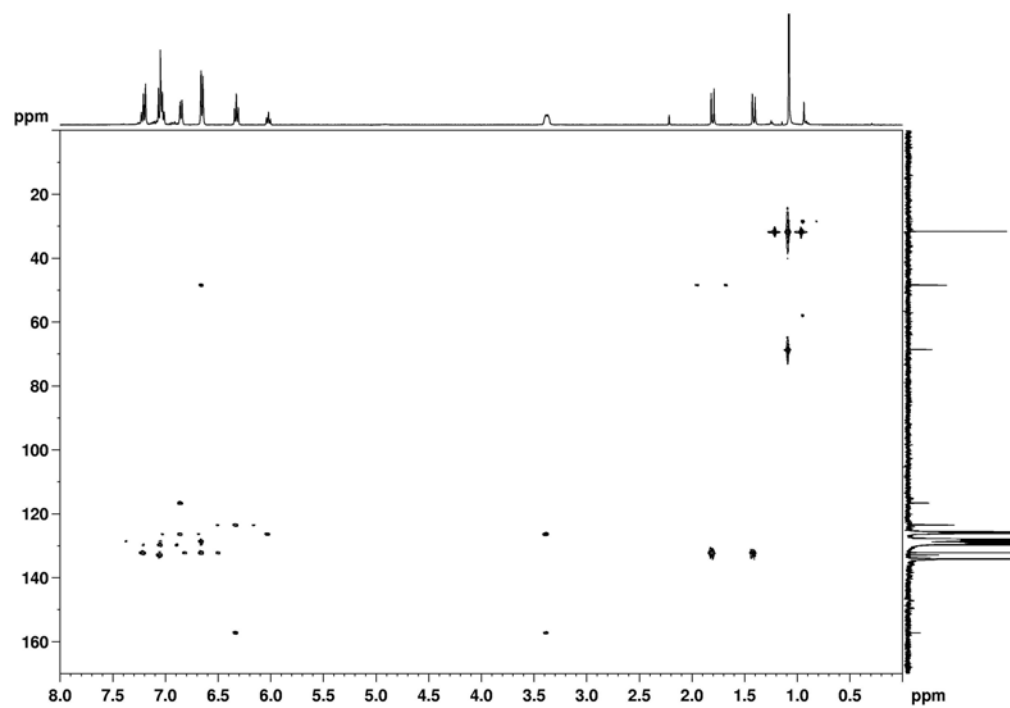

$^1\text{H}$ - $^{13}\text{C}$  HMQC Spectrum for Compound **11**

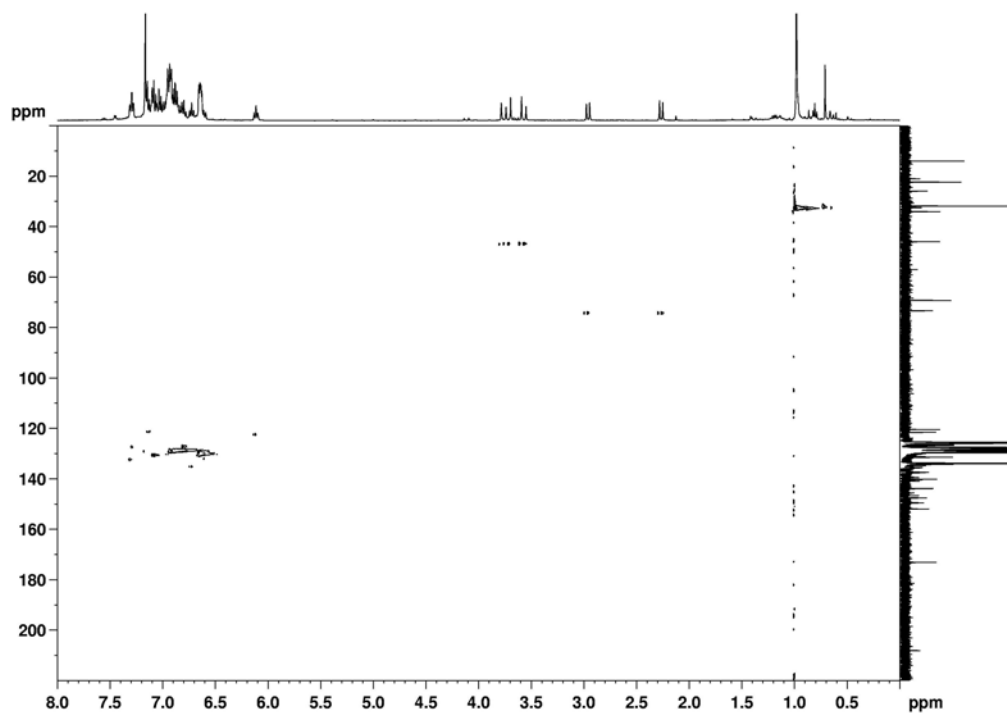

$^1\text{H}$ - $^{13}\text{C}$  HMBC Spectrum for Compound 11

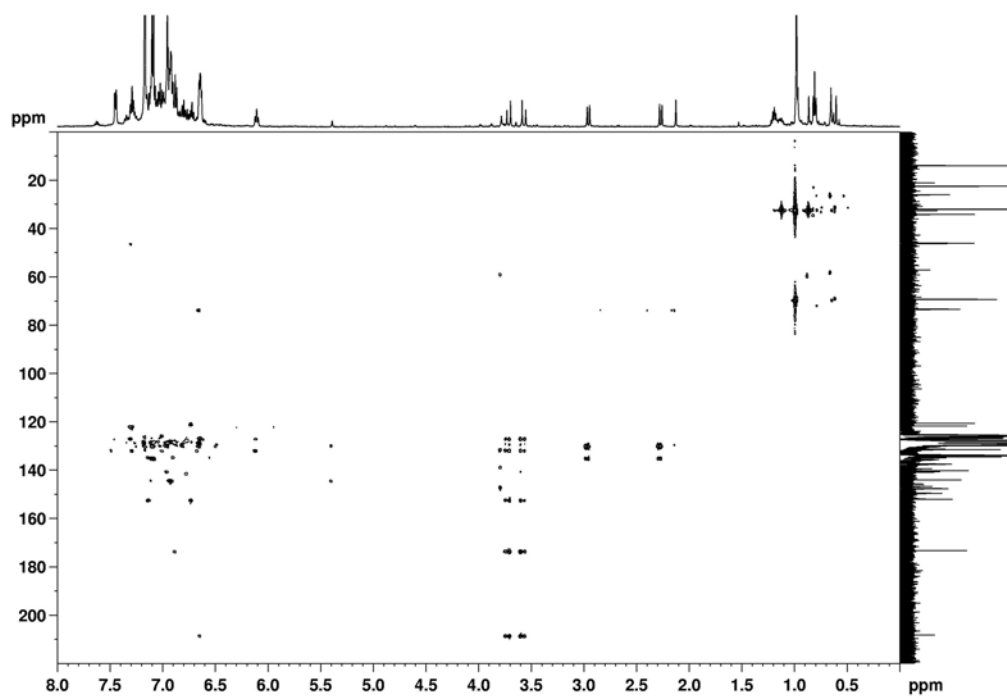

$^1\text{H}$ - $^{13}\text{C}$  HMQC Spectrum for Compound 13

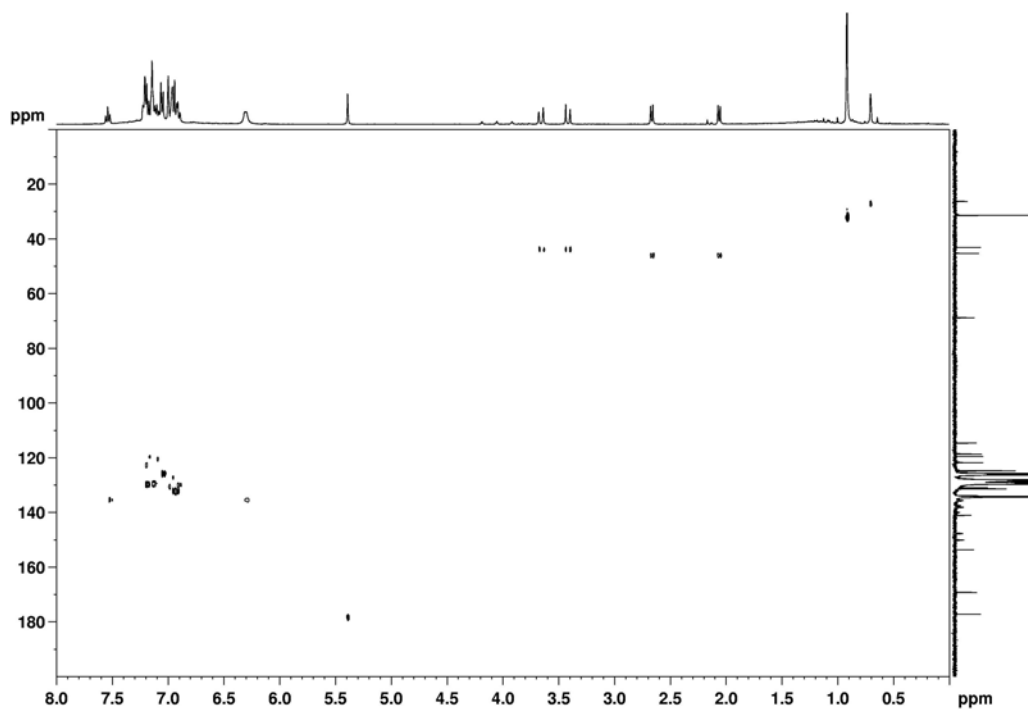

$^1\text{H}$ - $^{13}\text{C}$  HMBC Spectrum for Compound **13**

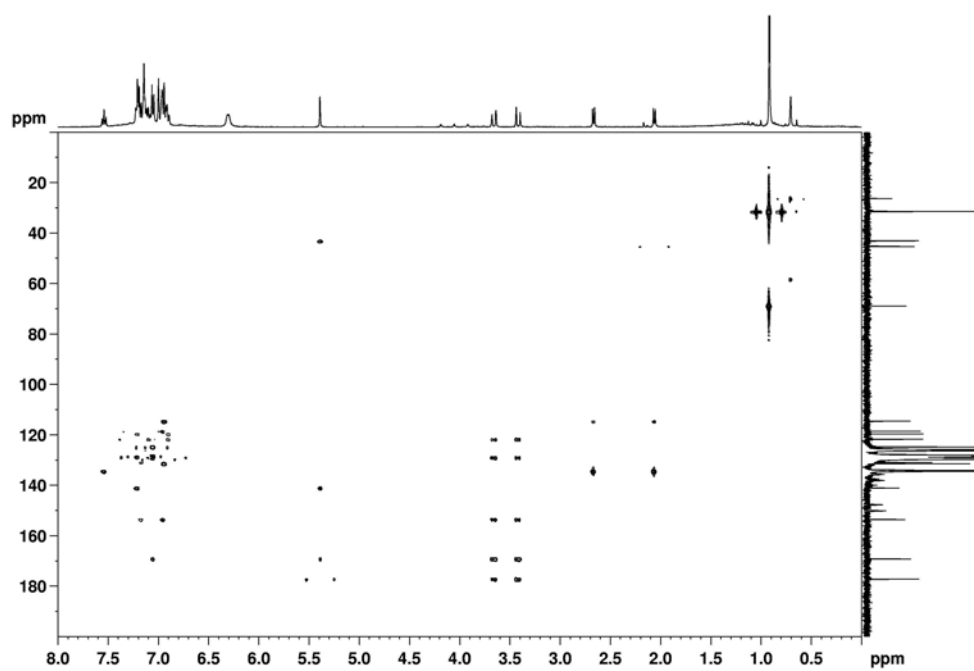

$^1\text{H}$ - $^1\text{H}$  TOCSY Spectrum for Compound 13

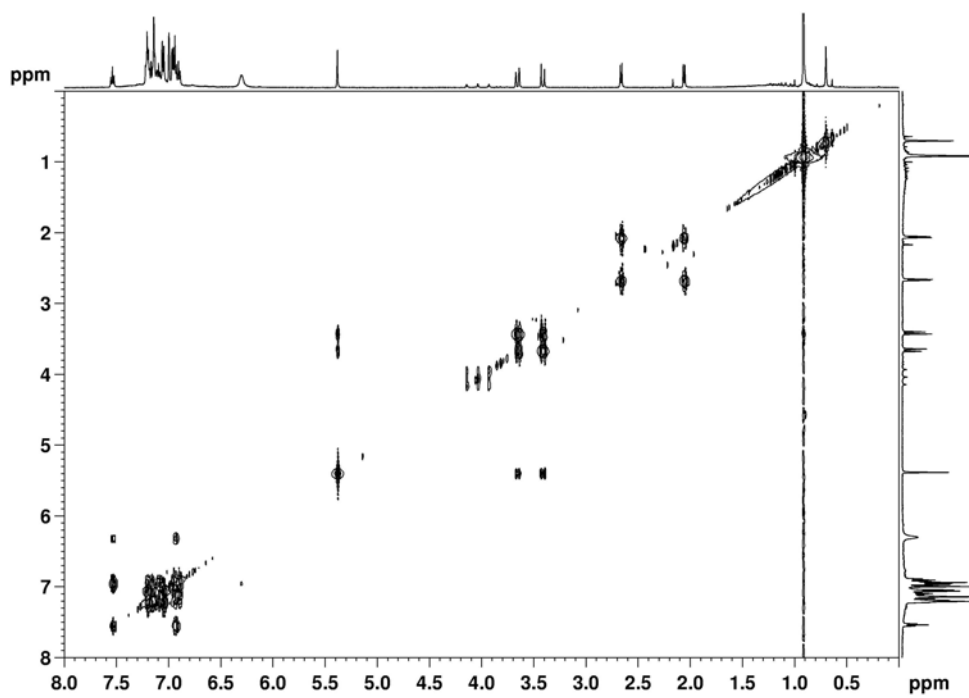

$^1\text{H}$ - $^{13}\text{C}$  HMQC Spectrum for Compound 14

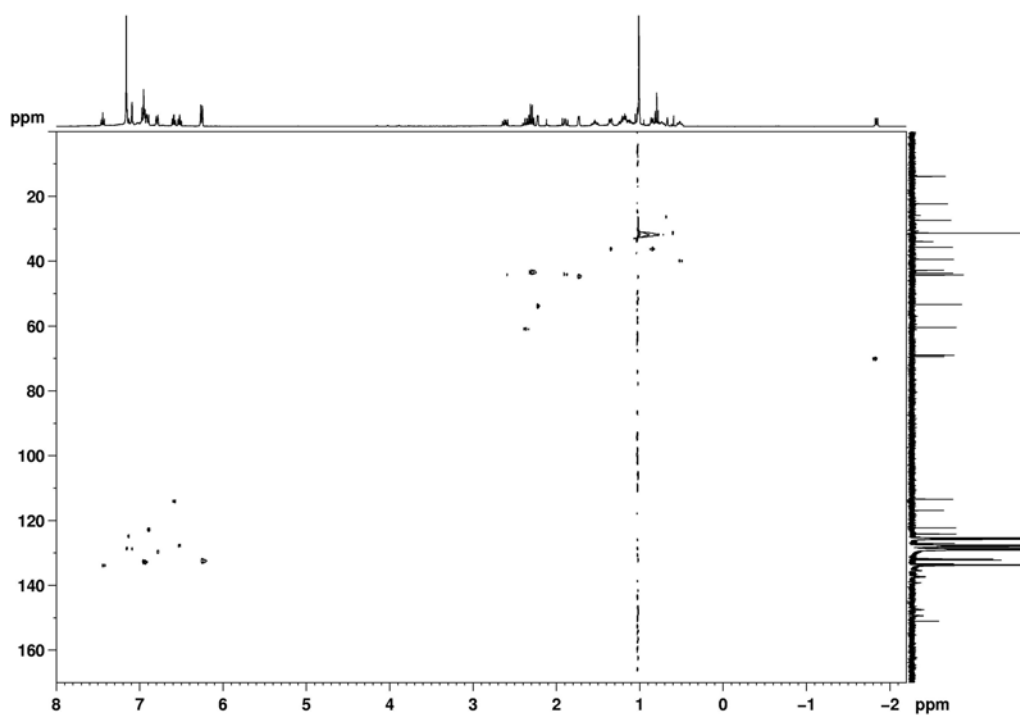



$^1\text{H}$ - $^{13}\text{C}$  HMBC Spectrum for Compound **14**

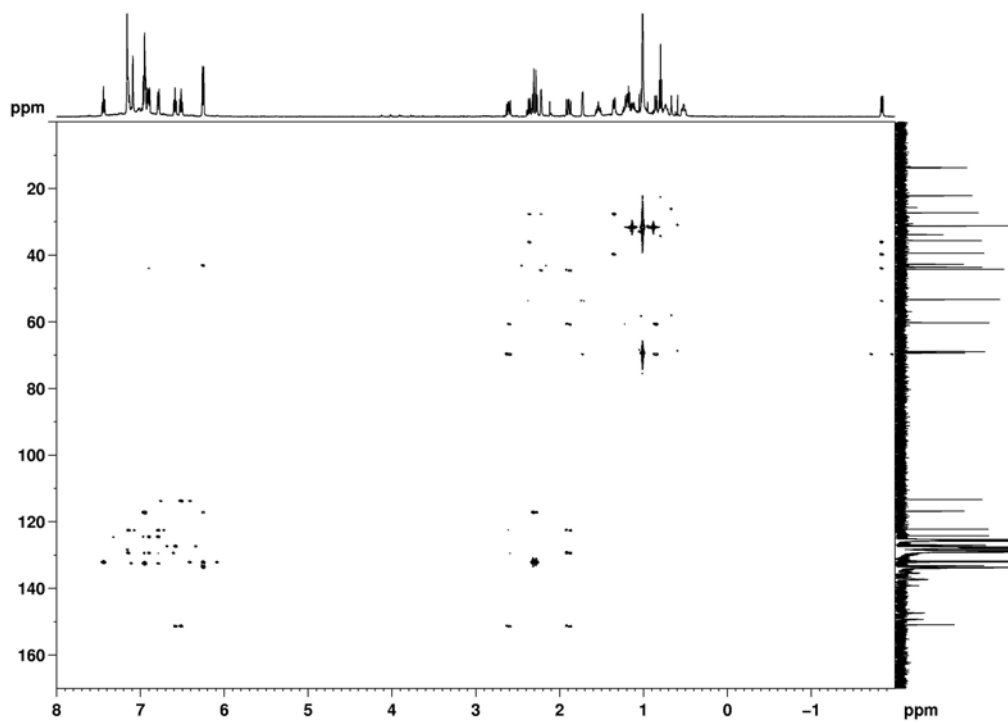

$^1\text{H}$ - $^1\text{H}$  NOESY Spectrum for Compound 14

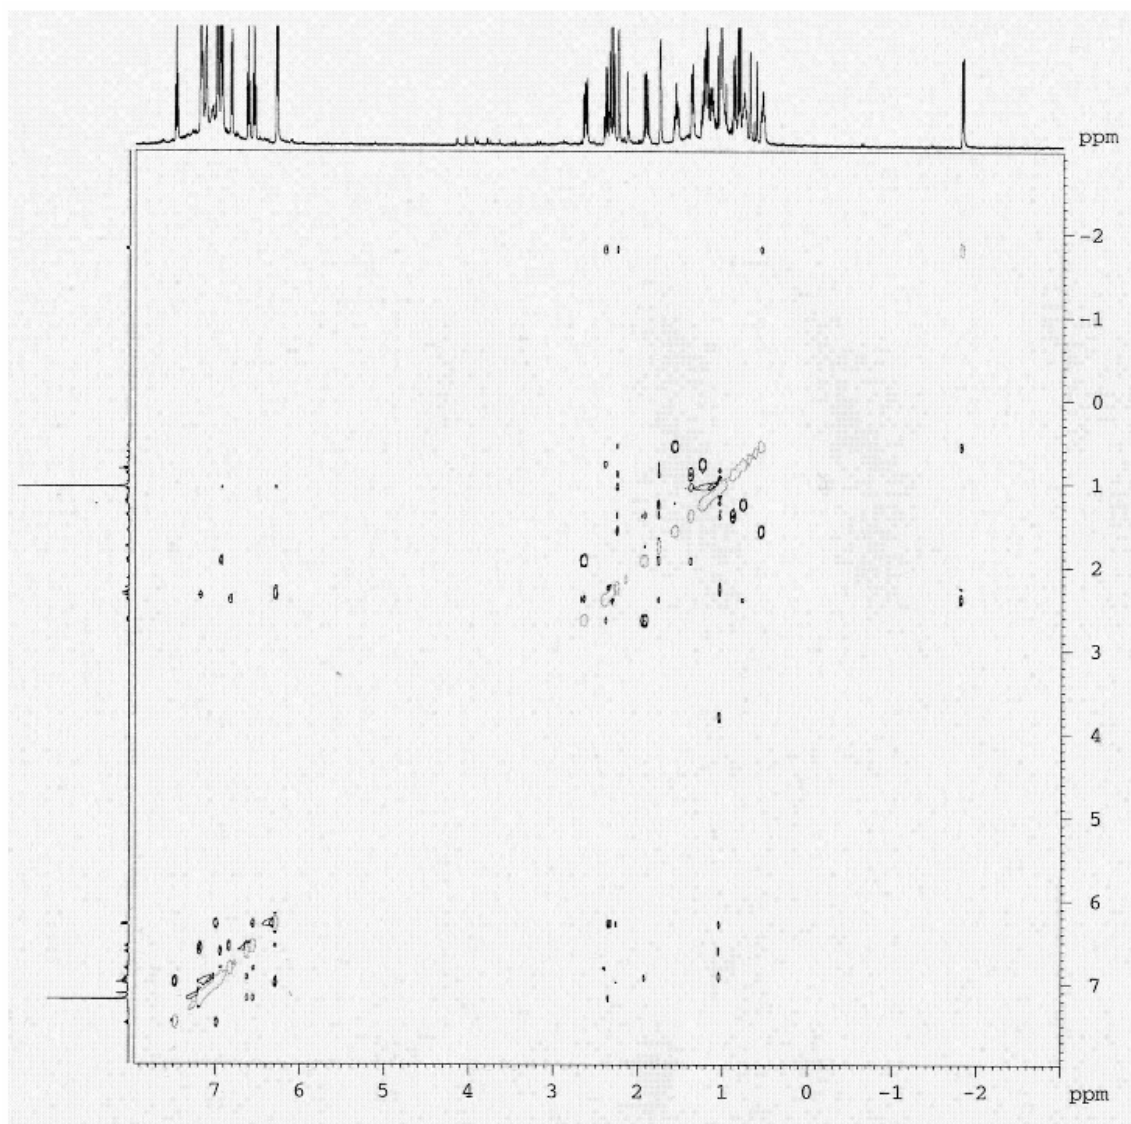

$^1\text{H}$ - $^{13}\text{C}$  HMQC Spectrum for Compound 16

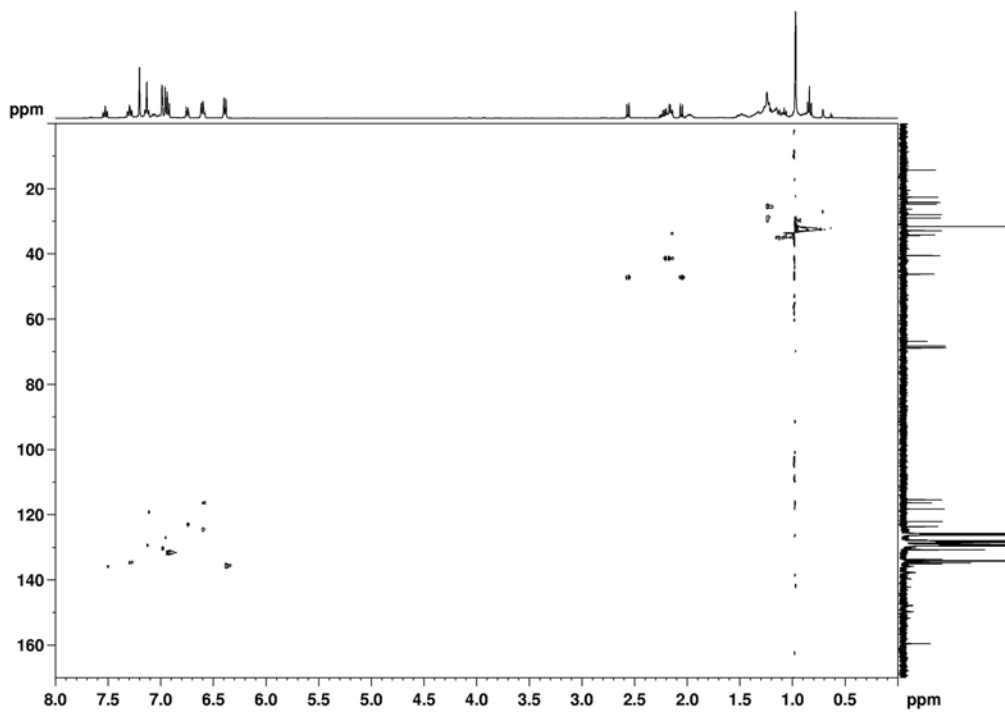

$^1\text{H}$ - $^{13}\text{C}$  HMBC Spectrum for Compound 16

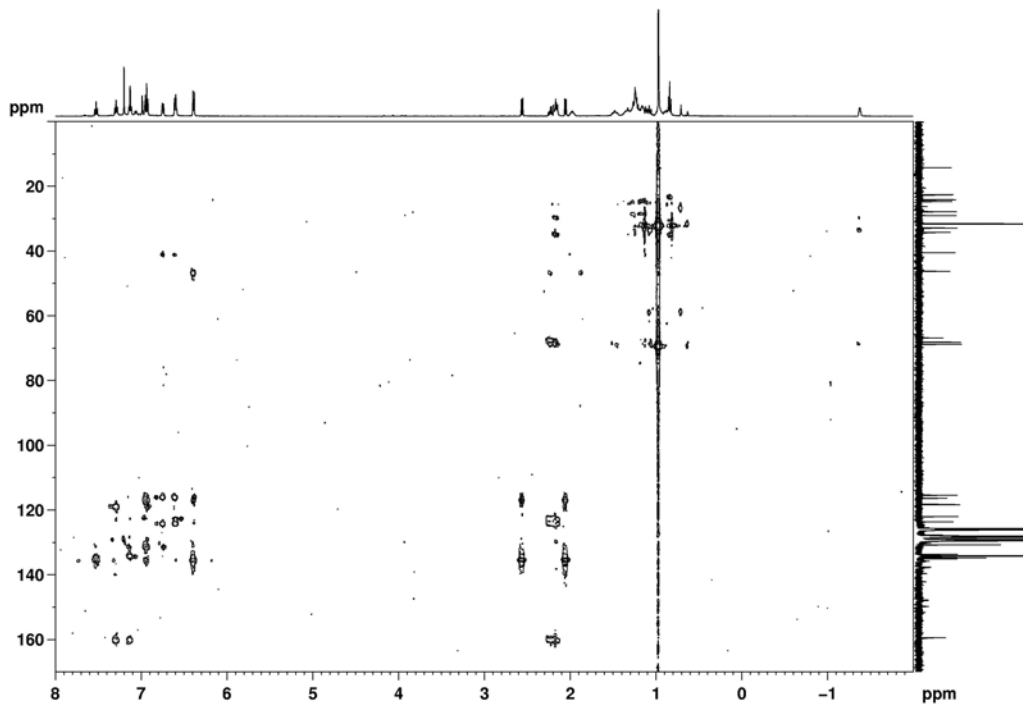

<sup>1</sup>H NMR Spectrum of Compound **5**.

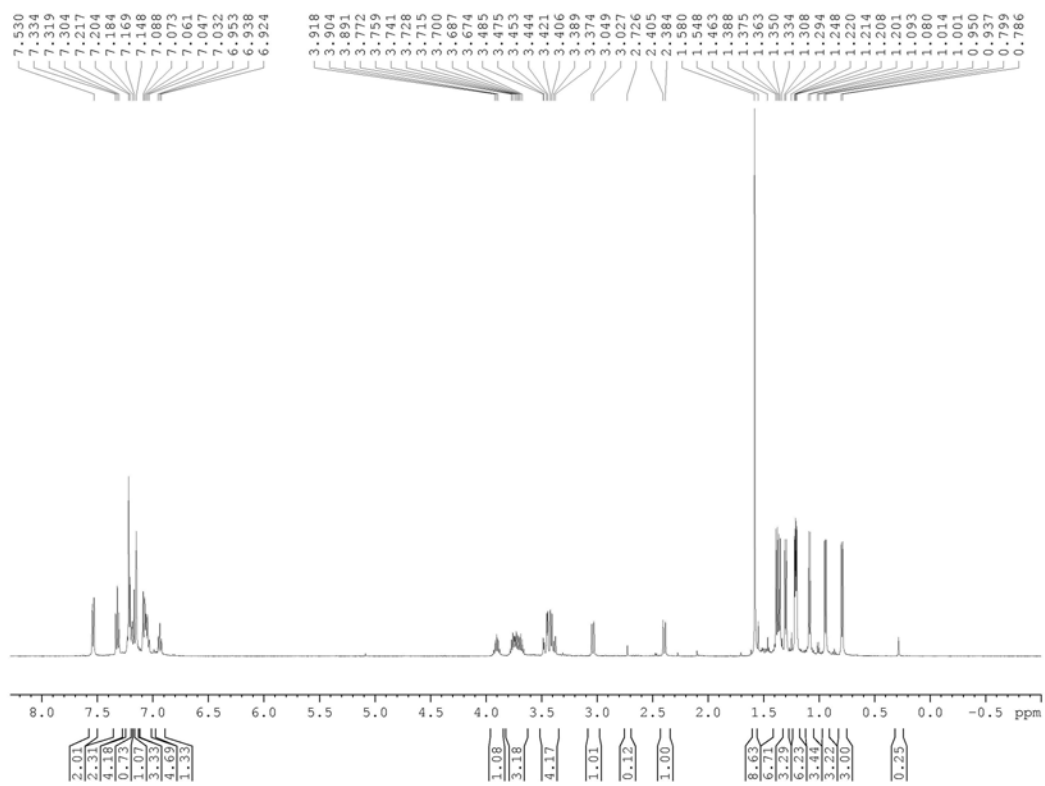

Supplement: NIHMS61168-supplement-si20060504_064.pdf [file NIHMS61168-supplement-si20060504_064.pdf]
